# Supplementary material for: Sugar–thioacetamide backbone in oligodeoxyribonucleosides for specific recognition of nucleic acids
Source: Royal Society of Chemistry journal article supplement (doi:10.1039/b603958h), 2006-01-01
Supplement: b603958h.pdf [file b603958h.pdf]

## Supplementary information

### **Sugar-thioacetamide Backbone in Oligodeoxyribonucleosides for Specific Recognition of Nucleic Acids**

**Khirud Gogoi, Anita D. Gunjal and Vaijayanti A. Kumar\***

**Division of Organic Chemistry, Synthesis, National Chemical Laboratory, Dr. Homi  
Bhabha Road, Pune 411008 INDIA**

**[va.kumar@ncl.res.in](mailto:va.kumar@ncl.res.in)**

### **Table of contents**

S2: General experimental procedure, spectral data of compounds 6 and 14.  
(S3-S6): MALDI-TOF and LCMS Mass spectra of compounds **6** and **14**.  
(S7-S12): HPLC profiles of TANA **15**, TANA **16**, TANA **17**, TANA **18**,  
and TANA **19**, *aegPNA20*.  
(S13-S18): Mass spectra (MALDI-TOF) of TANA **15**, TANA **16**, TANA  
**17**, TANA **18**, TANA **19**, *aegPNA20*.  
(S19): Melting curves of TANA **17**, TANA **18**, TANA **19**, *aegPNA20* with  
RNA**22** and their corresponding derivatives.  
(S20): Melting curves of TANA **15** and TANA **16** with RNA**22** and **23** and  
corresponding derivative curves.  
(S21): UV-Job's plot for TANA **15**:RNA**22**

**General Experimental Procedure:** Melting points of samples were determined in open capillary tubes and are uncorrected. IR spectra were recorded on an infrared Fourier Transform spectrophotometer using Chloroform, Nujol and KBr pellets. Column chromatographic separations were performed using silica gel 60-120 mesh, and 230-400 mesh, solvent systems EtOAc/Pet ether and pure MeOH/DCM.  $^1\text{H}$  and  $^{13}\text{C}$  were obtained using Bruker AC-200 (200 MHz) and 500 MHz NMR spectrometers. The chemical shifts are reported in delta ( $\delta$ ) values. The optical rotations were recorded in an ADP220 Polarimeter. Mass spectra were obtained either by LCMS and MALDI-TOF mass spectrometry techniques. Oligomers were purified and analyzed by RP HPLC, C18 column and MALDI-TOF mass spectrometry.

**3'-[9-fluorenylmethoxycarbonyloxy]-amino-3'-deoxy thymidin -5'-thioacetic acid, 6.**

M.p. 147-150 °C.  $[\alpha]_{\text{D}}^{20} +16^\circ$  (c 0.5; CH<sub>3</sub>OH). IR,  $\nu(\text{cm}^{-1})$ , (Chloroform)

3326.98, 2927.74, 2358.78, 1704.96, 1677.95, 1529.45, 1463.87.

$^1\text{H}$ NMR: (DMSO- $d_6$ , 200 MHz)  $\delta$  1.78(s, 3H; 5-CH<sub>3</sub>), 2.06-2.28(m, 2H; 2', 2''-H), 3.15-3.38(m, 2H; S-CH<sub>2</sub>), 3.4-4.32(m, 6H; 4'-H, 3'-H; 5', 5''-H, -CH<sub>2</sub> Fmoc), 6.06-6.12(t, 1H; 1'-H), 7.27-7.96(m, 10H; 6-H, Fmoc-H), 11.33(s, b, 1H, -NH).

$^{13}\text{C}$ (DMSO- $d_6$ , 200 MHz)  $\delta$  12.63(CH<sub>3</sub>), 34.68(CH<sub>2</sub>), 36.41(CH<sub>2</sub>), 47.28(CH), 53.75(CH), 62.66(CH<sub>2</sub>), 64.39(CH<sub>2</sub>), 83.25(CH), 83.83(CH), 110.57(C), 120.67(CH), 125.64(CH), 127.68(CH), 128.25(CH), 136.76(CH), 141.31(C), 144.29(C), 150.94(C=O), 156.44(C=O), 164.48(C=O), 172.04(C=O). Anal Calcd (%) for C<sub>27</sub>H<sub>27</sub>N<sub>3</sub>O<sub>7</sub>S: C 60.19; H 5.246; N 7.805, S 5.955; Found C 60.79; H 5.02; N 7.46; S 6.03. MS, M+Na<sup>+</sup>, Calculated 560.33; Observed, MALDI-TOF 560.38, LCMS 560.06.

**3'-[9-fluorenylmethoxycarbonyloxy]-amino-3'-deoxy 5-methyl cytidine 5'-thioacetic acid, 14** M.p. 160-163 °C.  $[\alpha]_{\text{D}}^{20} +18^\circ$  (c 0.5; CH<sub>3</sub>OH).

IR,  $\nu(\text{cm}^{-1})$ , (nujol) 3238.26, 2923.88, 2854.45, 1714.6, 1666.38 ( $\text{cm}^{-1}$ ).

$^1\text{H}$ NMR: (CDCl<sub>3</sub>+CD<sub>3</sub>OD, 200 MHz)  $\delta$  2.08(s, 3H; 5-Me), 2.26-2.55(m, 2H; 2', 2''-H), 3.2(m, 2H; -CH<sub>2</sub>, Fmoc), 3.22-3.44(m, 2H; -SCH<sub>2</sub>), 3.7-4.39(m, 4H; 4'-H, 5', 5''-H, 3'-H), 6.09(s, 1H; 1'-H), 7.29-8.07(m, 10H; 6-H, Fmoc-H).  $^{13}\text{C}$ (DMSO- $d_6$ )

13.4(CH<sub>3</sub>), 34.07(CH<sub>2</sub>), 35.97(CH<sub>2</sub>), 46.67(CH), 53.9(CH), 62.78(CH<sub>2</sub>), 66.06(CH<sub>2</sub>), 83.94(C), 83.97(CH), 110.71(C), 120.74(CH), 125.69(CH), 127.9(CH), 128.45(CH), 137.02(CH), 141.9(C), 144.53(C), 151.2(C), 156.49(C=O), 166.23(C=O), 172.32(C=O).

MS, M; M+Na<sup>+</sup> Calculated 536.60, 559.39; Observed MALDI-TOF, 559.43; LCMS 537.06

MALDI-TOF mass of compound **6**

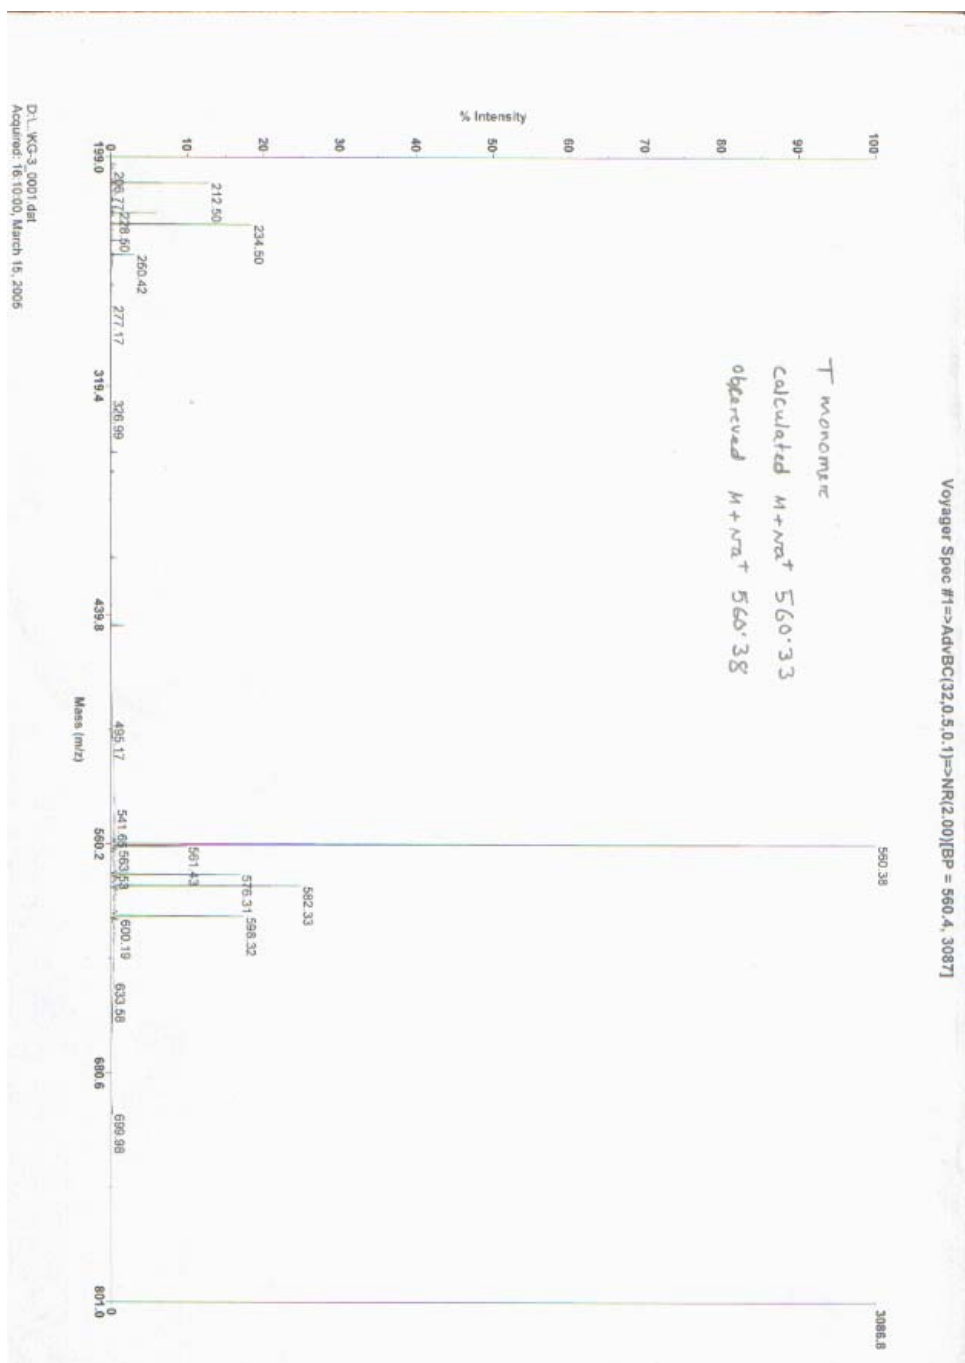

LCMS of compound **6**

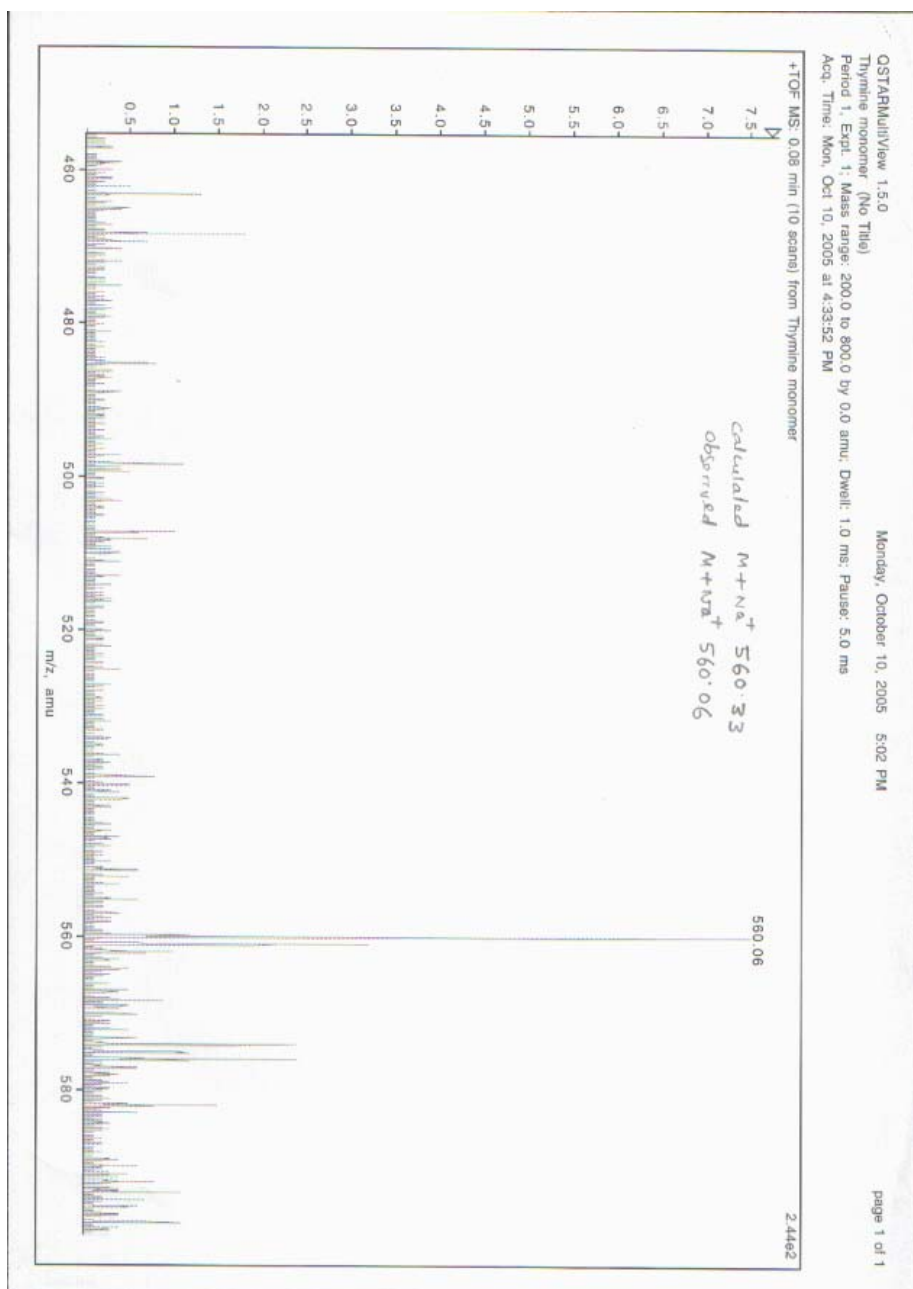

MALDI-TOF of compound **14**

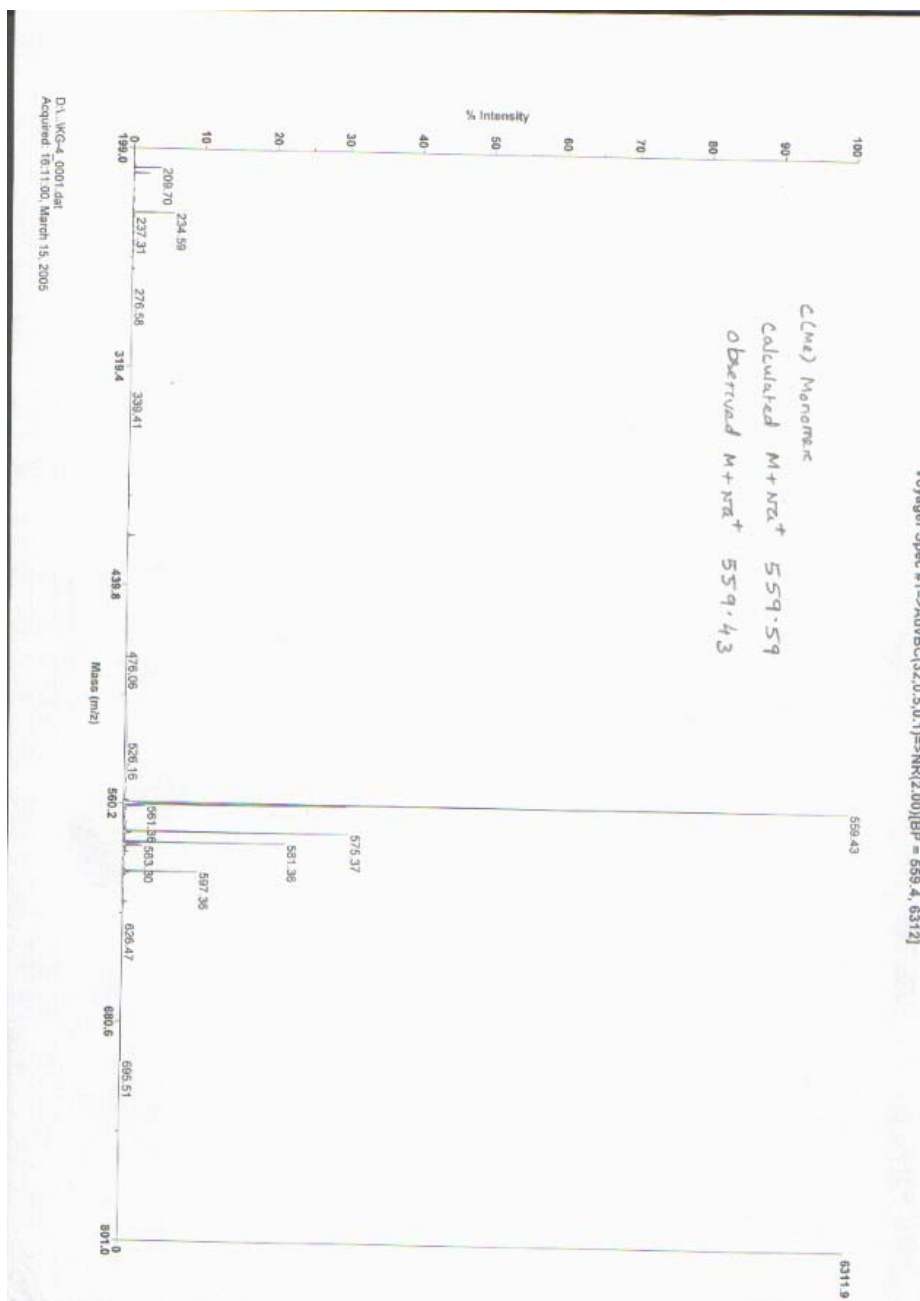

LCMS of compound **14**

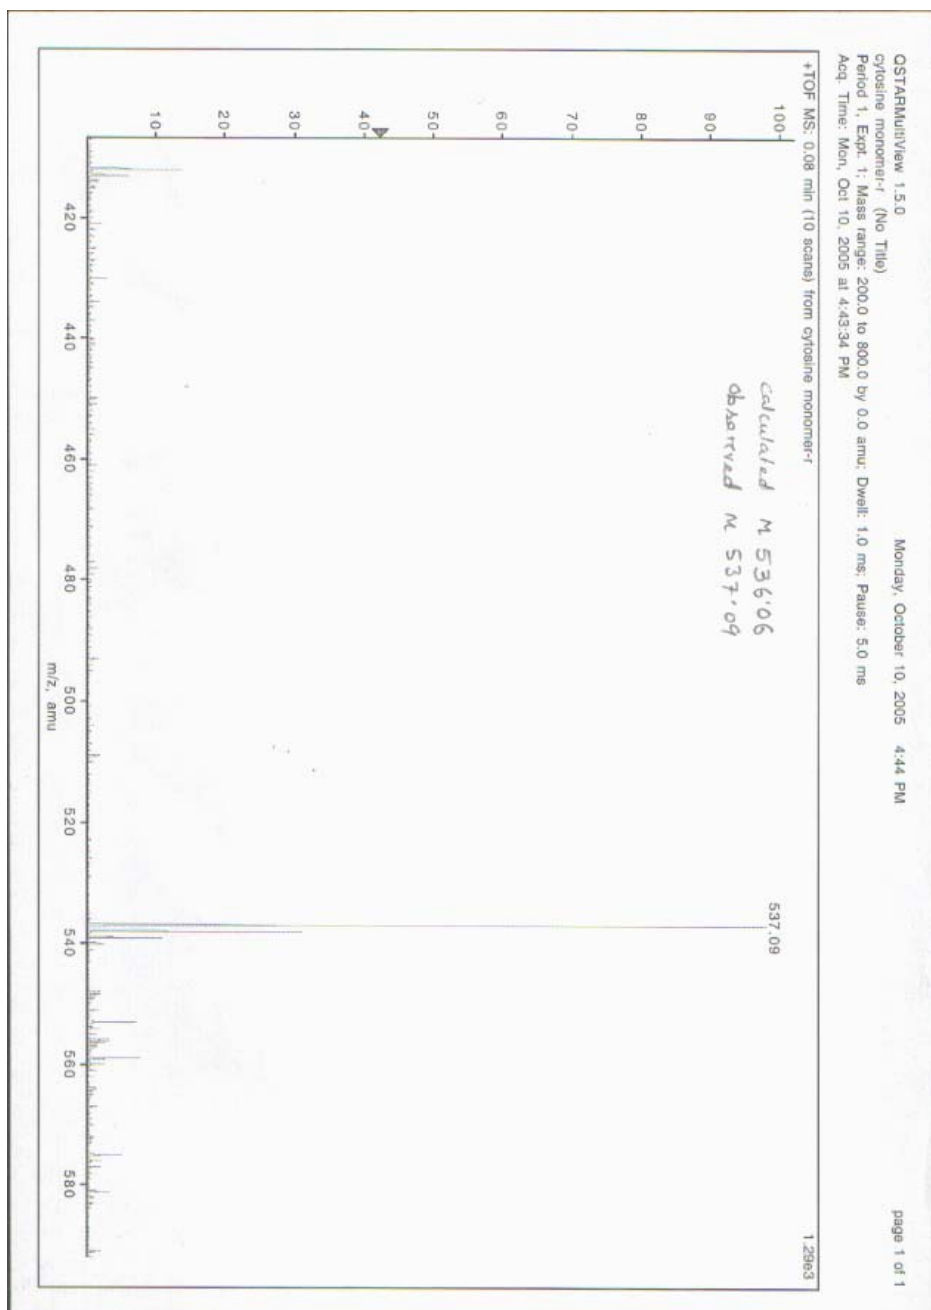

HPLC profile of **TANA15**

Data File: c:\star\data\gogai\k 1006.run  
Channel: A = A 1.0 RESULTS  
Sample ID: K 1  
Operator (Inj): SSK/MVM  
Injection Date: 11/21/05 03:45:25 PM  
Injection Method: c:\star\method 1.mth  
Run Time (min): 20.002

Calc Date: 11/21/05 04:07:45 PM  
Calculation Method: c:\star\method 1.mth  
Instrument (Calc): Varian Star #1  
Peak Measurement: Peak Area  
Calculation Type: Percent

Varian Star #1

N/A  
N/A

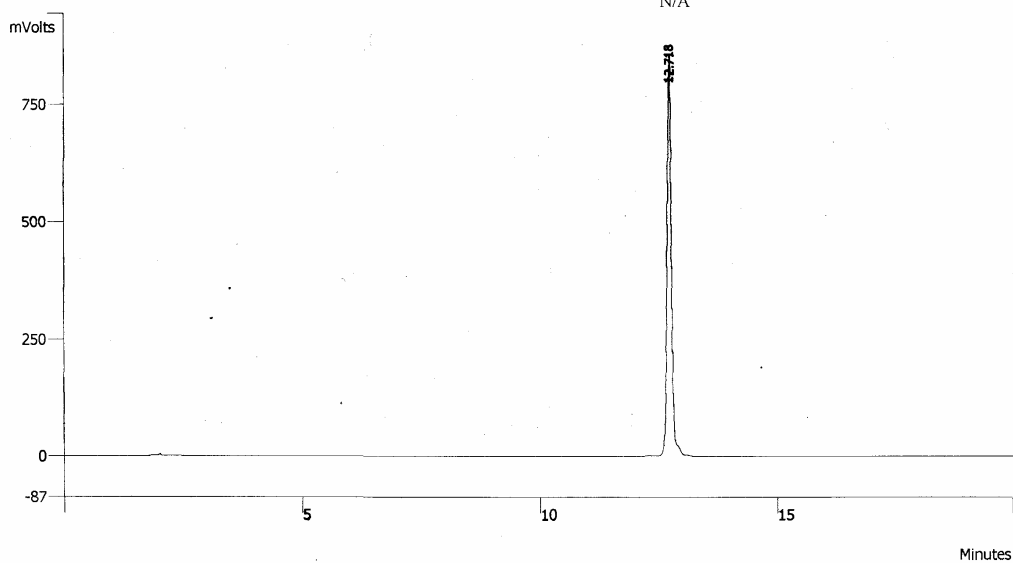

| Peak No | Ret. Time (min) | Width 1/2 (sec) | Peak Area (counts) | Result (%)      |
|---------|-----------------|-----------------|--------------------|-----------------|
| 1       | 12.718          | 6.0             | 5465171            | 100.0000        |
|         |                 |                 | <b>5465171</b>     | <b>100.0000</b> |

# HPLC profile of TANA16

|                   |                           |                         |                      |
|-------------------|---------------------------|-------------------------|----------------------|
| Data File:        | c:\star\data\gogai\k6.run | Operator (Calc):        | SSK/MVM              |
| Channel:          | A = A 1.0 RESULTS         | Calc Date:              | 12/23/05 04:18:37 PM |
| Sample ID:        | K6                        | Times Calculated:       | 1                    |
| Operator (Inj):   | SSK/MVM                   | Calculation Method:     | c:\star\method 1.mth |
| Injection Date:   | 12/23/05 03:58:33 PM      | Instrument (Calc):      | Varian Star #1       |
| Injection Method: | c:\star\method 1.mth      | Run Mode:               | Analysis             |
| Run Time (min):   | 20.002                    | Peak Measurement:       | Peak Area            |
| Workstation:      |                           | Calculation Type:       | Percent              |
| Instrument (Inj): | Varian Star #1            | Calibration Level:      | N/A                  |
|                   |                           | Verification Tolerance: | N/A                  |

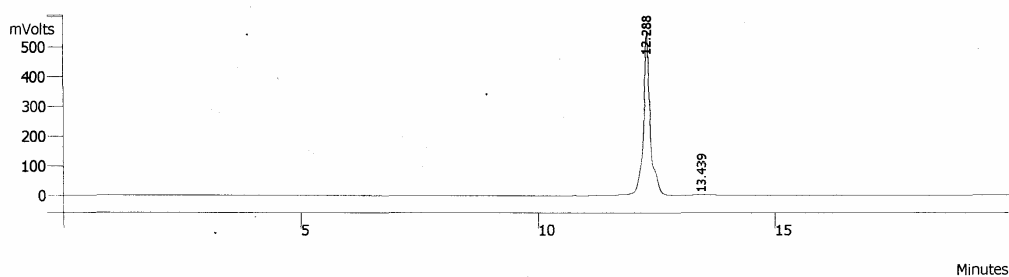

| Peak No | Ret. Time (min) | Width 1/2 (sec) | Peak Area (counts) | Result (%)      |
|---------|-----------------|-----------------|--------------------|-----------------|
| 1       | 12.288          | 7.5             | 5647819            | 98.7647         |
| 2       | 13.439          | 0.0             | 70642              | 1.2353          |
|         |                 |                 | <b>5718461</b>     | <b>100.0000</b> |

# HPLC profile of TANA17

Data File: c:\star\data\gogai\tt7.run  
Channel: A = A 1.0 RESULTS  
Sample ID: T7  
Operator (Inj): SSK/MVM  
Injection Date: 05/19/05 02:06:26 PM  
Injection Method: c:\star\method 1.mth  
Run Time (min): 17.002  
Workstation:  
Instrument (Inj): Varian Star #1

Operator (Calc): SSK/MVM  
Calc Date: 05/19/05 02:23:28 PM  
Times Calculated: 1  
Calculation Method: c:\star\method 1.mth  
Instrument (Calc): Varian Star #1  
Run Mode: Analysis  
Peak Measurement: Peak Area  
Calculation Type: Percent  
Calibration Level: N/A  
Verification Tolerance: N/A

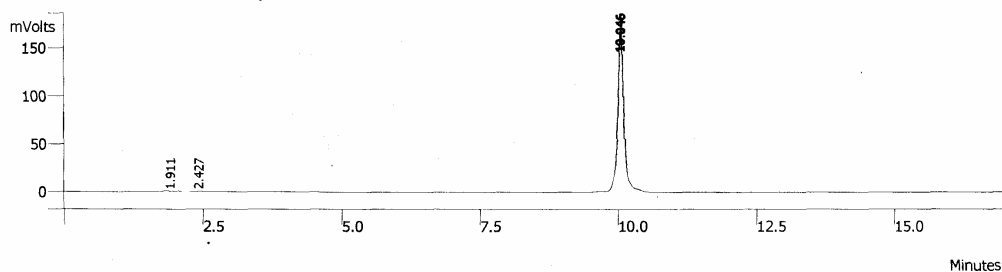

| Peak No | Ret. Time (min) | Width 1/2 (sec) | Peak Area (counts) | Result (%)      |
|---------|-----------------|-----------------|--------------------|-----------------|
| 1       | 1.911           | 12.3            | 15652              | 1.1294          |
| 2       | 2.427           | 0.0             | 9796               | 0.7069          |
| 3       | 10.046          | 6.6             | 1360423            | 98.1638         |
|         |                 |                 | <b>1385871</b>     | <b>100.0001</b> |

HPLC profile of TANA18

|                   |                                |                         |                      |
|-------------------|--------------------------------|-------------------------|----------------------|
| Data File:        | c:\star\data\gogai\t4 + t3.run | Operator (Calc):        | SSK/MVM              |
| Channel:          | A = A 1.0 RESULTS              | Calc Date:              | 05/19/05 01:48:04 PM |
| Sample ID:        | T4 + T3                        | Times Calculated:       | 1                    |
| Operator (Inj):   | SSK/MVM                        | Calculation Method:     | c:\star\method 1.mth |
| Injection Date:   | 05/19/05 01:33:04 PM           | Instrument (Calc):      | Varian Star #1       |
| Injection Method: | c:\star\method 1.mth           | Run Mode:               | Analysis             |
| Run Time (min):   | 15.002                         | Peak Measurement:       | Peak Area            |
| Workstation:      |                                | Calculation Type:       | Percent              |
| Instrument (Inj): | Varian Star #1                 | Calibration Level:      | N/A                  |
|                   |                                | Verification Tolerance: | N/A                  |

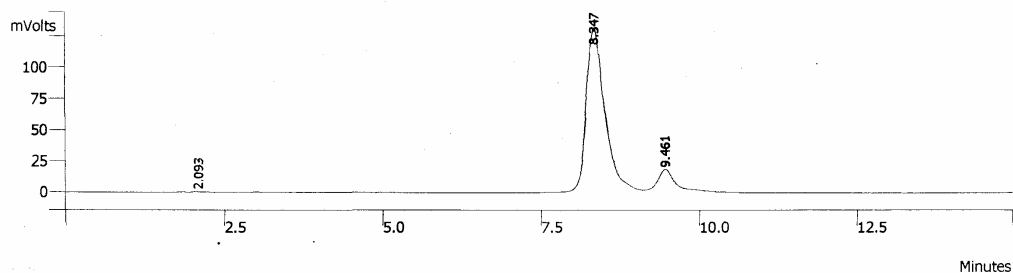

| Peak No | Ret. Time (min) | Width 1/2 (sec) | Peak Area (counts) | Result (%)      |
|---------|-----------------|-----------------|--------------------|-----------------|
| 1       | 2.093           | 5.8             | 12115              | 0.3805          |
| 2       | 8.347           | 18.4            | 2755717            | 86.5504         |
| 3       | 9.461           | 15.8            | 416112             | 13.0691         |
|         |                 |                 | <b>3183944</b>     | <b>100.0000</b> |

HPLC profile of TANA19

Data File: c:\star\data\gogai\tt4.run  
Channel: A = A 1.0 RESULTS  
Sample ID: tT4  
Operator (Inj): SSK/MVM  
Injection Date: 05/19/05 02:38:13 PM  
Injection Method: c:\star\method 1.mth  
Run Time (min): 15.002  
Workstation:  
Instrument (Inj): Varian Star #1

Operator (Calc): SSK/MVM  
Calc Date: 05/19/05 02:53:13 PM  
Times Calculated: 1  
Calculation Method: c:\star\method 1.mth  
Instrument (Calc): Varian Star #1  
Run Mode: Analysis  
Peak Measurement: Peak Area  
Calculation Type: Percent  
Calibration Level: N/A  
Verification Tolerance: N/A

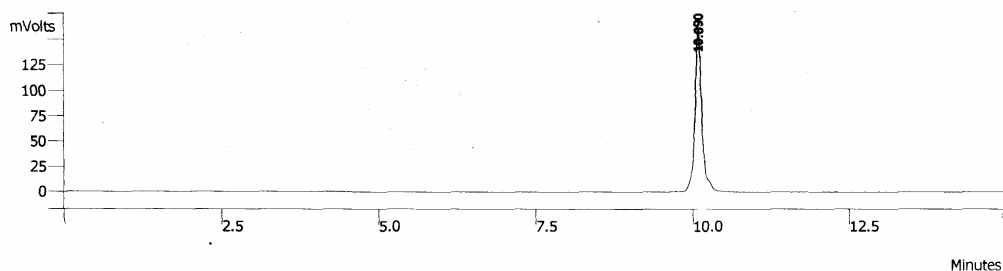

| Peak No | Ret. Time (min) | Width 1/2 (sec) | Peak Area (counts) | Result (%)      |
|---------|-----------------|-----------------|--------------------|-----------------|
| 1       | 10.090          | 7.6             | 1265286            | 100.0000        |
|         |                 |                 | <b>1265286</b>     | <b>100.0000</b> |

HPLC profile of aeg PNA 20

Data File: c:\star\data\gogait8001.run  
Channel: A = A 1.0 RESULTS  
Sample ID: T8  
Operator (Inj): SSK/MVM  
Injection Date: 05/19/05 12:35:27 PM  
Injection Method: c:\star\method 1.mth  
Run Time (min): 15.002  
Workstation:  
Instrument (Inj): Varian Star #1

Operator (Calc): SSK/MVM  
Calc Date: 05/19/05 12:50:30 PM  
Times Calculated: 1  
Calculation Method: c:\star\method 1.mth  
Instrument (Calc): Varian Star #1  
Run Mode: Analysis  
Peak Measurement: Peak Area  
Calculation Type: Percent  
Calibration Level: N/A  
Verification Tolerance: N/A

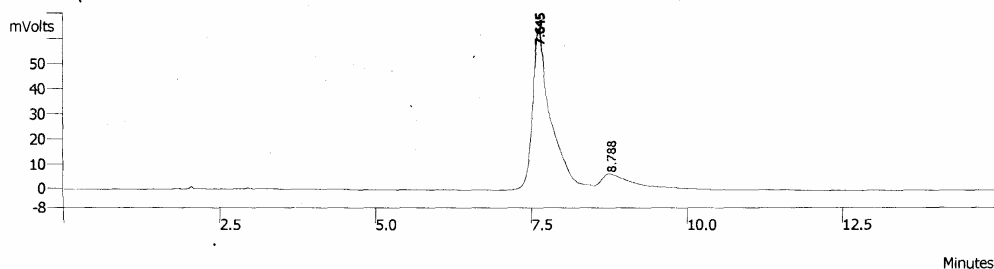

| Peak No | Ret. Time (min) | Width 1/2 (sec) | Peak Area (counts) | Result (%)      |
|---------|-----------------|-----------------|--------------------|-----------------|
| 1       | 7.645           | 16.5            | 1320725            | 83.1217         |
| 2       | 8.788           | 29.9            | 268181             | 16.8783         |
|         |                 |                 | <b>1588906</b>     | <b>100.0000</b> |

MALDI-TOF mass of **TANA15**

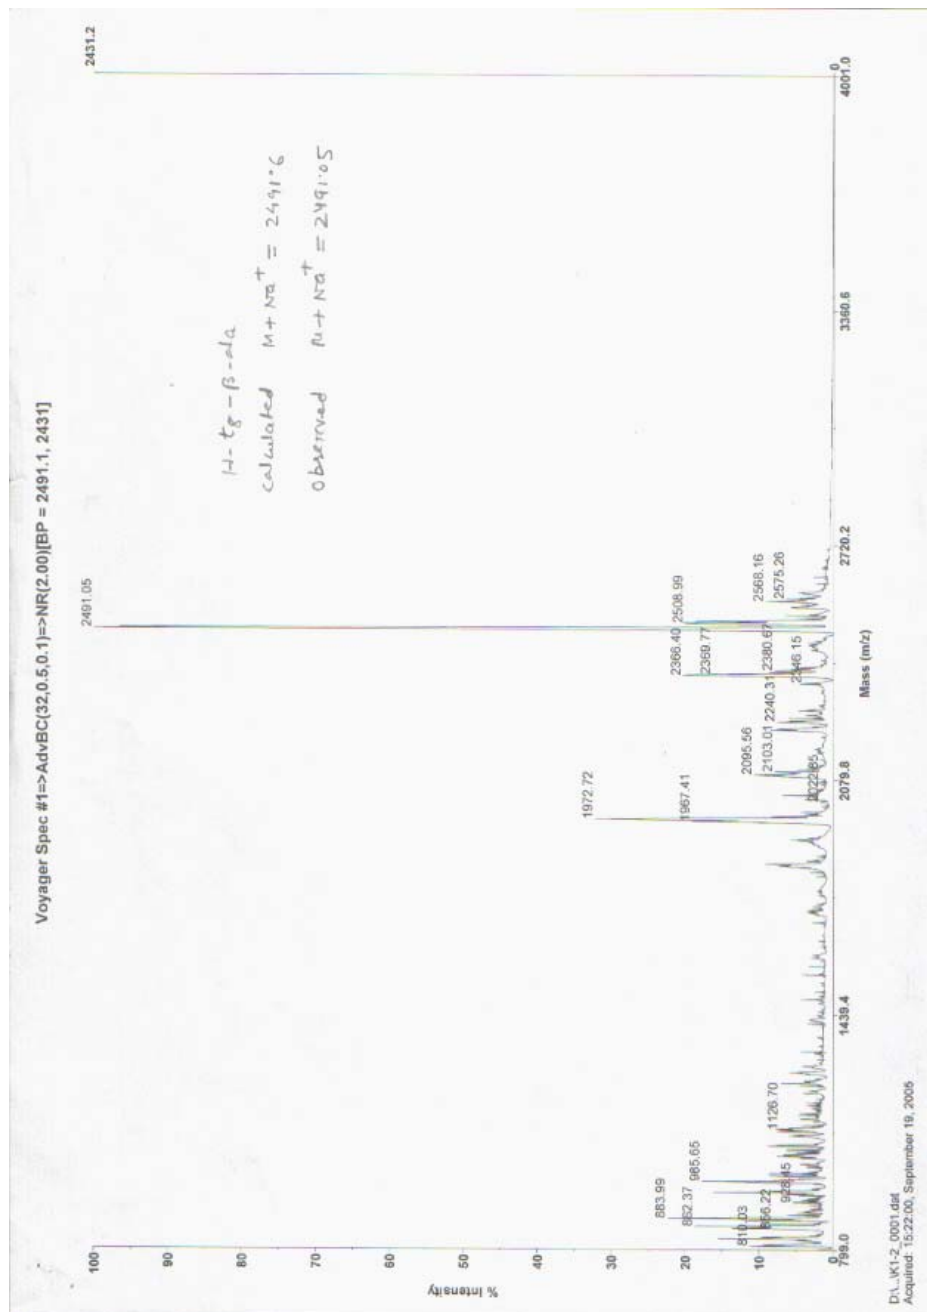

MALDI-TOF mass of **TANA16**

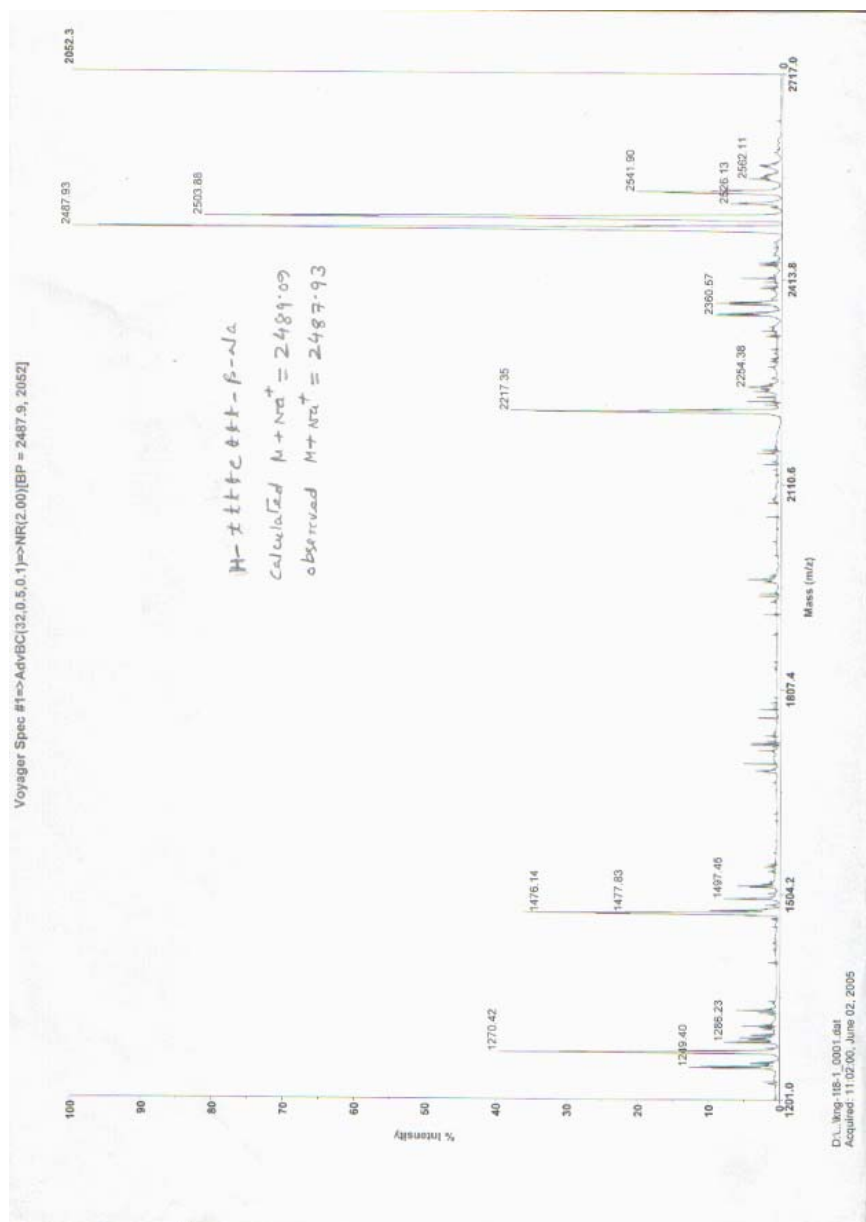

MALDI-TOF of TANA17

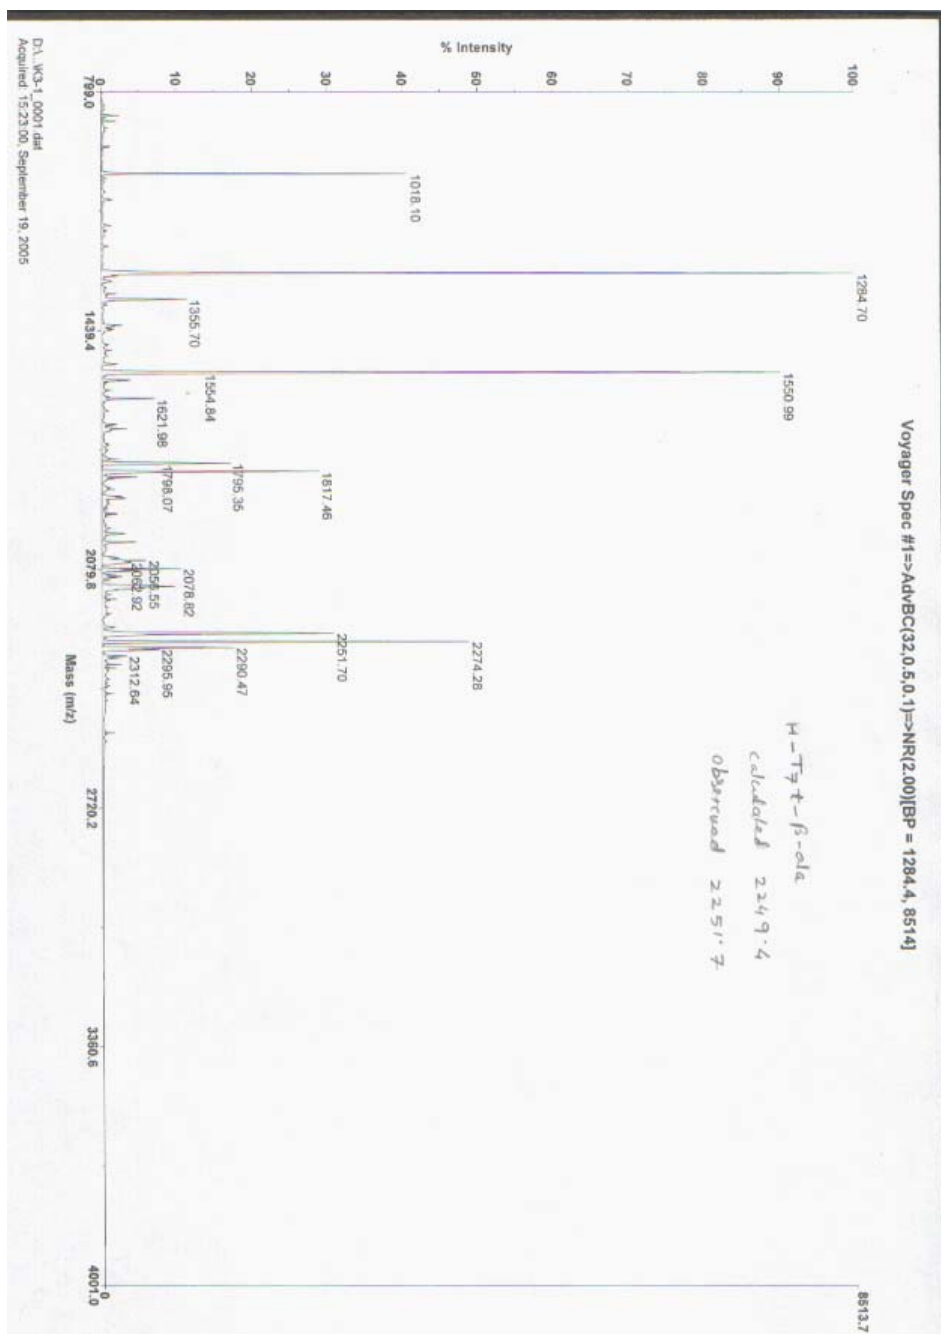

MALDI-TOF mass of **TANA18**

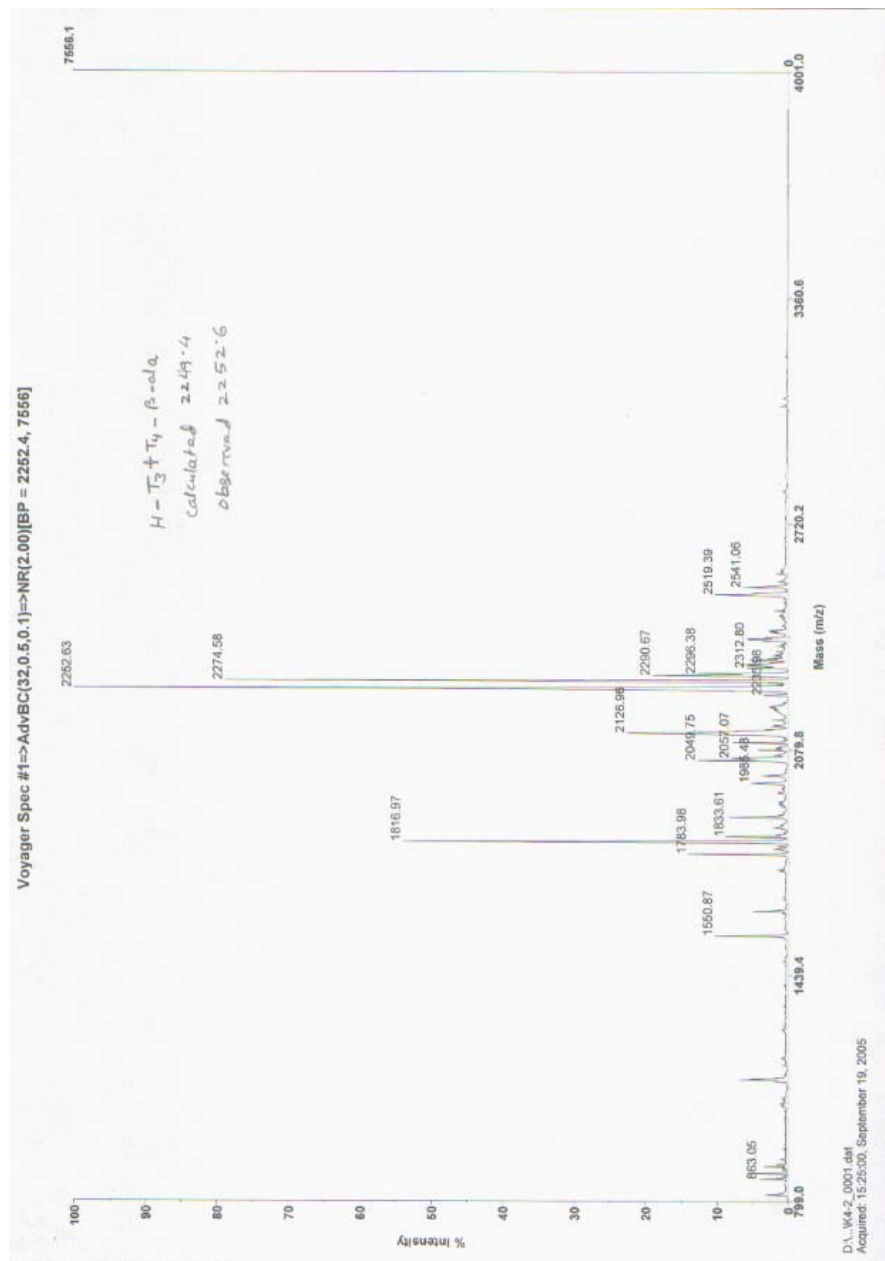

MALDI-TOF mass of TANA19

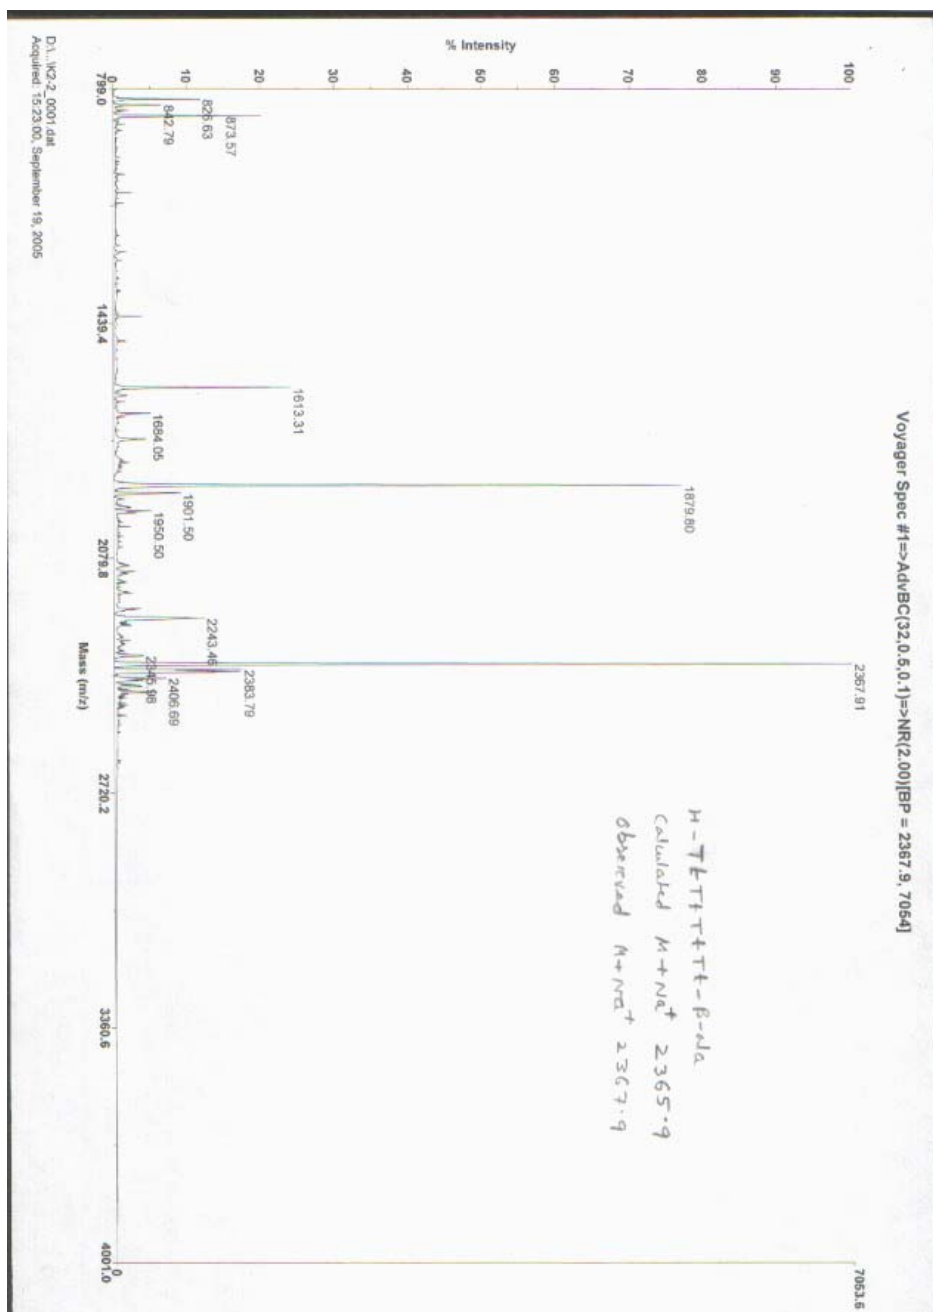

MALDI-TOF mass of **aeg PNA 20**

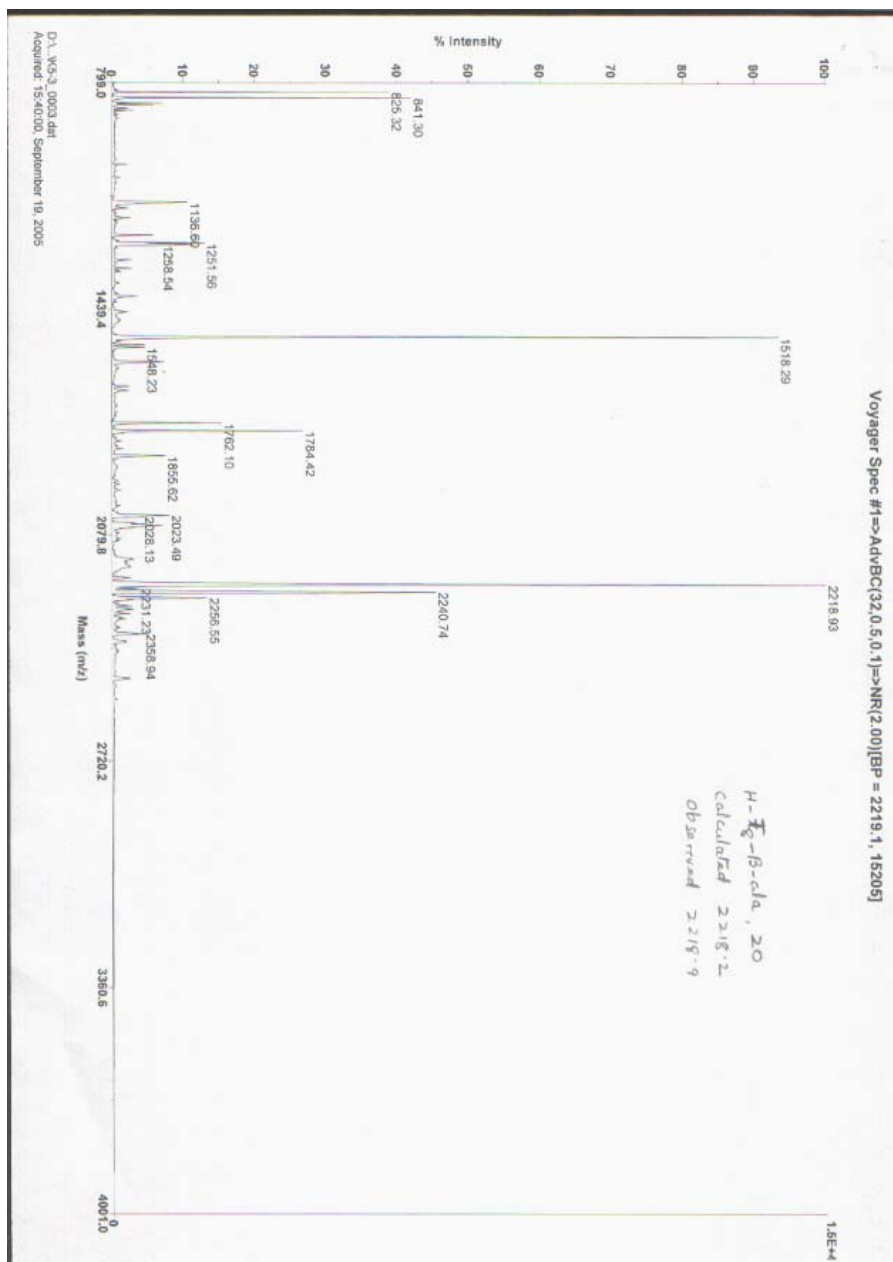

**UV-*T<sub>m</sub>* measurements:** The complementary DNA and RNA oligomers were synthesized on an Applied Biosystems DNA Synthesizer. The concentration was calculated on the basis of absorbance from the molar extinction coefficients of the corresponding nucleobases. The complexes were prepared in 10 mM sodium phosphate buffer, pH 7.4 containing NaCl (10 mM) and were annealed by keeping the samples at 90°C for 5 minutes followed by slow cooling to room temperature. Absorbance versus temperature profiles were obtained by monitoring at 260 nm with Perkin-Elmer Lambda 35 spectrophotometer scanning from 10 to 85°C at a ramp rate of 0.2/0.5°C per minute. The data were processed using Microcal Origin 6.0 and *T<sub>m</sub>* values derived from the derivative curves.

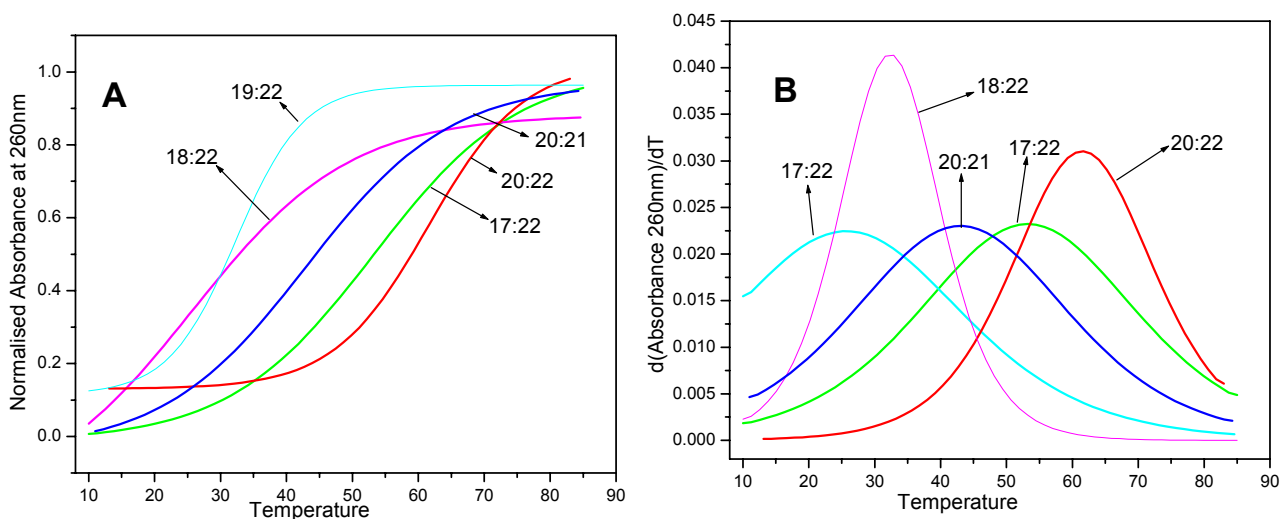

Fig A. Melting curve of TANA 17, 18, 19 & *aegPNA20* with RNA 22 B. Corresponding derivative curve.

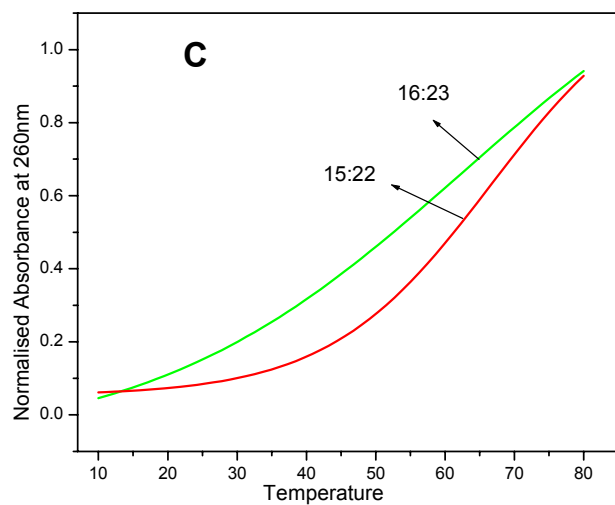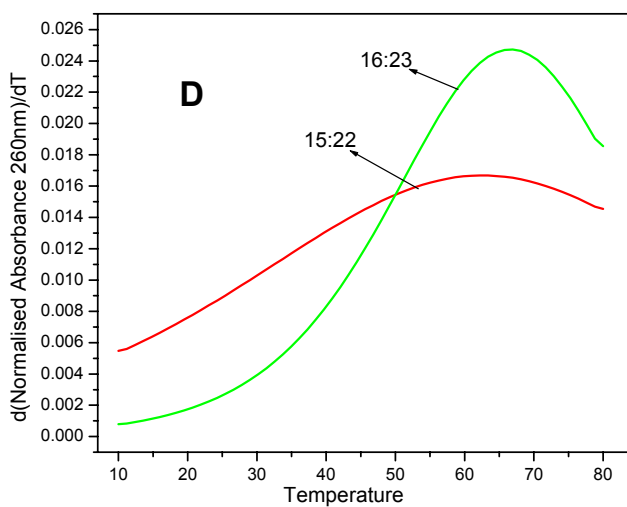

Fig: C. Melting curve of TANA15 and 16 with RNA22 and 23, 10mM phosphate buffer (pH= 5.5) and 10 mM NaCl concentration. D. Corresponding derivative curve

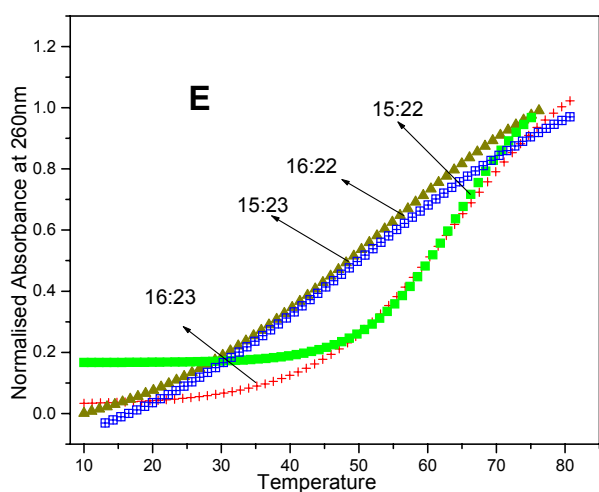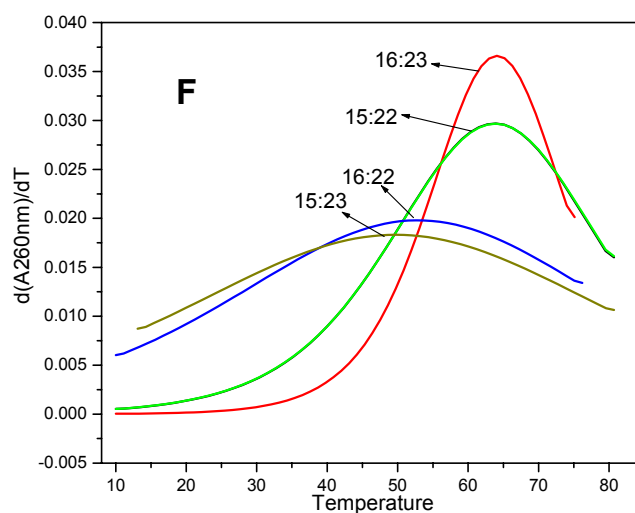

Fig: E UV-melting curve of TANA 15 & 16, DNA 24 with complementary RNA 22 and 23 F. Corresponding derivative curves.

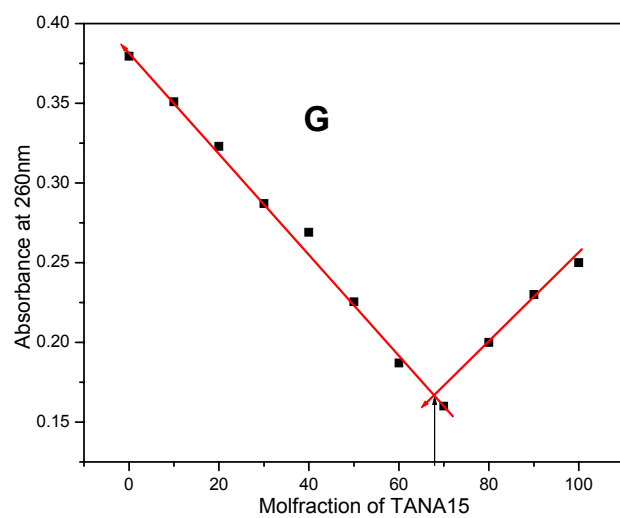

Fig: **G** UV-Jobs Plot of **TANA15** with **RNA22**
